# Supplementary material for: Utility of Single Items within the Suicidal Behaviors Questionnaire-Revised (SBQ-R): A Bayesian Network Approach and Relative Importance Analysis
Source: MDPI journal article supplement (doi:10.3390/bs14050410), 2024-05-14

Figure S1

*Extended Results from Table 2: Set of Conditional Probability Tables for the U.S. Undergraduate Sample (N = 1,160)*

|                                                                                     |                                                                |                                                            |                 |            |           |
|-------------------------------------------------------------------------------------|----------------------------------------------------------------|------------------------------------------------------------|-----------------|------------|-----------|
| 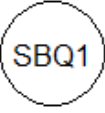   |                                                                | <b>SBQ1</b><br>(History of suicidal thoughts and attempts) |                 |            |           |
|                                                                                     |                                                                | Never                                                      | Passing thought | Had a plan | Attempted |
|                                                                                     |                                                                | 0.48                                                       | 0.29            | 0.16       | 0.07      |
|    | <b>SBQ2</b><br>(frequency of suicidal ideation)                | <b>SBQ1</b><br>(History of suicidal thoughts and attempts) |                 |            |           |
|                                                                                     |                                                                | Never                                                      | Passing thought | Had a plan | Attempted |
|                                                                                     |                                                                | 0.99                                                       | 0.40            | 0.20       | 0.19      |
|                                                                                     |                                                                | 1 time                                                     | 0.01            | 0.38       | 0.27      |
|                                                                                     |                                                                | 2 times                                                    | 0               | 0.16       | 0.26      |
|                                                                                     |                                                                | 3-4 times                                                  | 0               | 0.04       | 0.16      |
|                                                                                     |                                                                | 5 or more times                                            | 0               | 0.02       | 0.11      |
|  | <b>SBQ3</b><br>(communication of intent to die by suicide)     | <b>SBQ1</b><br>(History of suicidal thoughts and attempts) |                 |            |           |
|                                                                                     |                                                                | No                                                         | Passing thought | Had a plan | Attempted |
|                                                                                     |                                                                | 0.98                                                       | 0.73            | 0.44       | 0.29      |
|                                                                                     |                                                                | At one time                                                | 0.02            | 0.25       | 0.43      |
|  | <b>SBQ4</b><br>(self-reported likelihood of a suicide attempt) | <b>SBQ1</b><br>(History of suicidal thoughts and attempts) |                 |            |           |
|                                                                                     |                                                                | Never                                                      | Passing thought | Had a plan | Attempted |
|                                                                                     |                                                                | 0.89                                                       | 0.58            | 0.19       | 0.19      |
|                                                                                     |                                                                | No chance at all                                           | 0.08            | 0.24       | 0.16      |
|                                                                                     |                                                                | Rather unlikely                                            | 0.03            | 0.15       | 0.39      |
|                                                                                     |                                                                | Unlikely                                                   | 0               | 0.02       | 0.15      |
|                                                                                     |                                                                | Likely                                                     | 0               | 0          | 0.08      |
|                                                                                     |                                                                | Rather likely                                              | 0               | 0          | 0.02      |
|                                                                                     |                                                                | Very likely                                                | 0               | 0          | 0         |

Figure S2

*Extended Results from Table 3: Set of Conditional Probability Tables for the Chinese Undergraduate Sample (N = 1,141)*

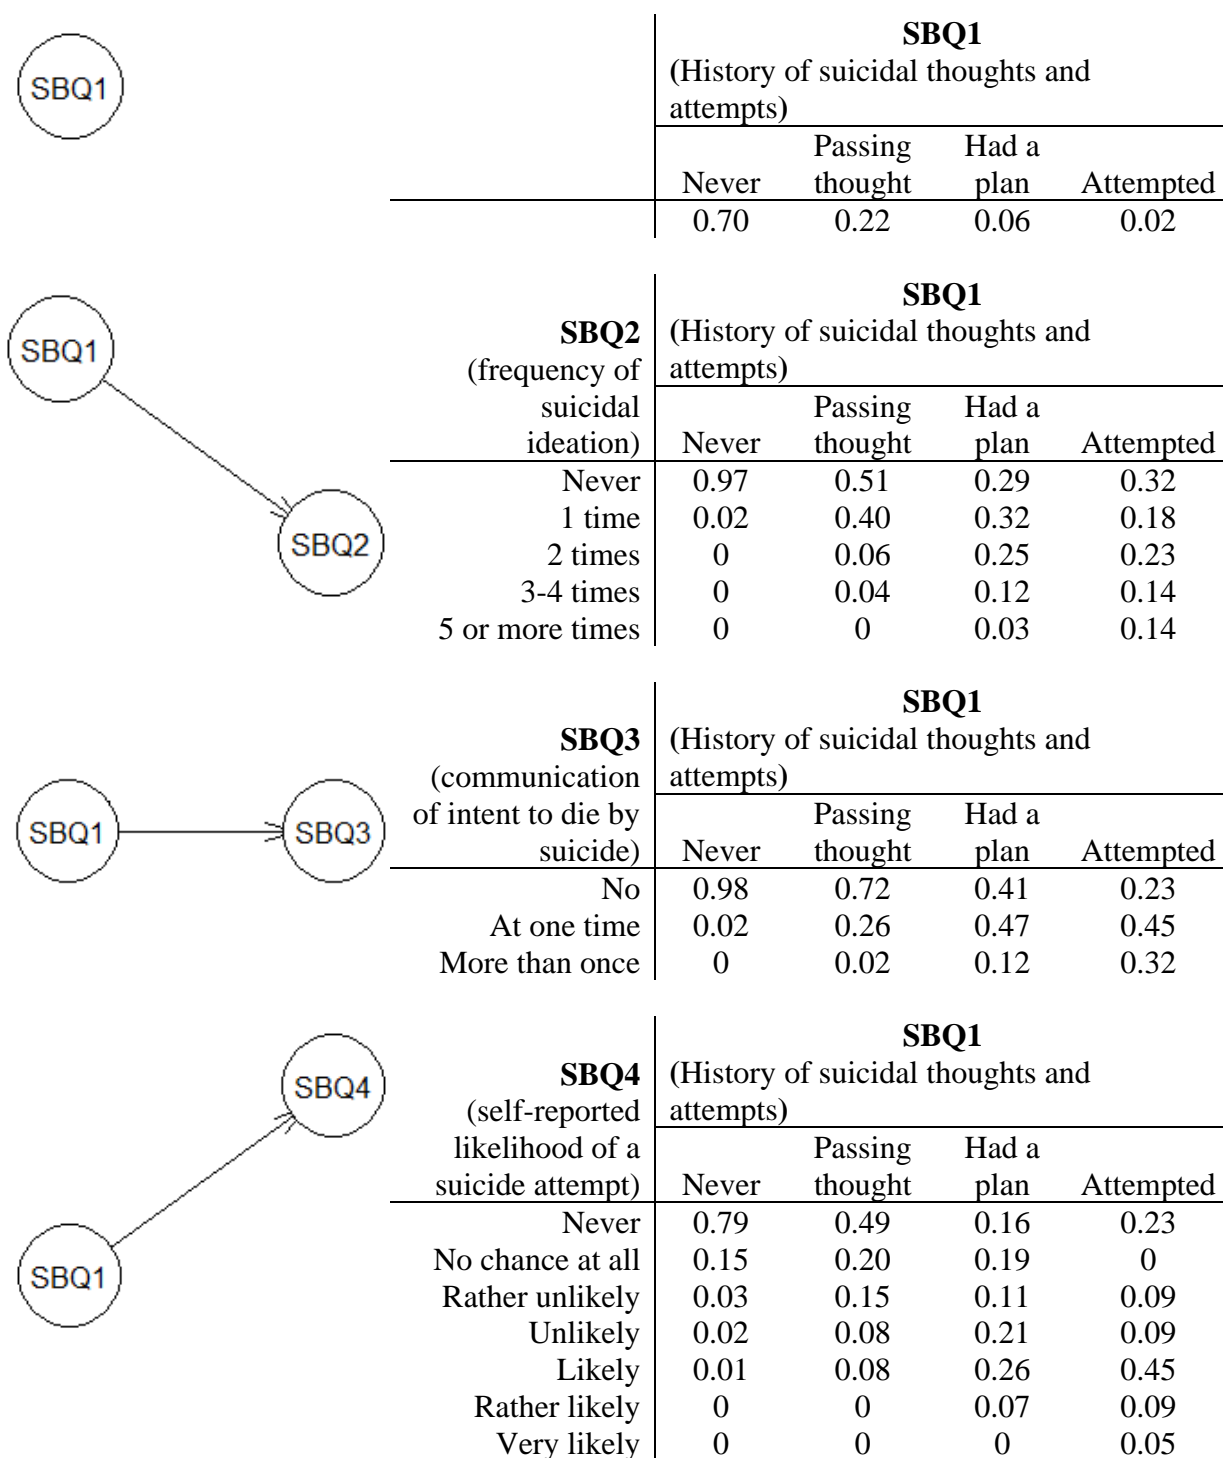

Supplement: s1 [file s1]
